# Supplementary material
Source: publisher figshare collection journal article supplement (https://wiley.figshare.com/articles/dataset/_/3518399)
Supplement: Supplementary file 1 [file 1 › appendix-A.htm]

Ecological Archives A023-034-A1


*Ecological Archives* A023-034-A1

Masatoshi Sugeno, Stephan B. Munch. 2013. A semiparametric Bayesian approach to estimating maximum reproductive rates at low population sizes. *Ecological Applications* 23:699–709. http://dx.doi.org/10.1890/12-0453.1

Appendix A. Description of the conditional Gaussian process (GP) prior used in this study.

> View / download PDF.


---

[Back to A023-034]
