# Supplementary material
Source: publisher figshare collection journal article supplement (https://wiley.figshare.com/articles/dataset/_/3518399)
Supplement: Supplementary file 1 [file 1 › appendix-A.pdf]

## Appendix A: The conditional Gaussian process prior.

The conditional GP prior  $f(S)$  can be derived first by applying the techniques for obtaining the conditional normal distribution from a joint normal distribution. In the standard multivariate normal setting, when  $x_1$  and  $x_2$  are jointly normal with mean  $[\mu_1, \mu_2]^T$  and covariance  $\Sigma$ , the distribution for  $x_2$  given  $x_1$  is

$$(A.1) \quad \mu_{2|1} = \mu_2 + \Sigma_{2,1}(\Sigma_{1,1})^{-1}(x_1 - \mu_1)$$

$$\Sigma_{2|1} = \Sigma_2 - \Sigma_{2,1}(\Sigma_{1,1})^{-1}\Sigma_{2,1}^T,$$

where  $\Sigma_{i,j}$  denotes the partition of  $\Sigma$  corresponding covariance among  $i$  and  $j$ , e.g.,  $\Sigma_{1,2}$ , represents the covariances among elements of vectors  $x_1$  and  $x_2$  (e.g., Hogg et al. 2004).

To make use of this we construct a joint GP prior:

$$(A.2) \quad \begin{bmatrix} f(S) \\ f(0) \end{bmatrix} \sim \text{GP} \left[ \begin{pmatrix} \mu(S) \\ \mu(0) \end{pmatrix}, \begin{pmatrix} \Sigma(S, S') & \Sigma(S, 0) \\ \Sigma(S, 0)^T & \Sigma(0, 0') \end{pmatrix} \right].$$

$\Sigma(S, S')$  is a covariance function for  $f(S)$ , which is given by  $\Sigma(S, S') = \tau^2 \exp[-\phi / |(S - S') / \max(S)|^2]$ .  $\Sigma(S, 0)$  is a covariance between  $f(S)$  and  $f(0)$ , which is  $\Sigma(S, 0) = \tau^2 \exp[-\phi |S / \max(S)|^2]$ .  $\Sigma(0, 0')$  is a variance for an univariate Gaussian process model  $f(0)$ , which is  $\Sigma(0, 0') = \tau^2$ . With Eqs. A.1 and A.2, we can derive the conditional GP prior:

$$(A.3) \quad f(S) | f(0) = \ln \alpha \sim \text{GP}[\mu_c, \Sigma_c]$$

where

$$(A.4) \quad \mu_c = \mu(S) + \Sigma(S, 0)[\Sigma(0, 0')]^{-1}[\ln \alpha - \mu(0)] = \mu(S)$$

$$(A.5) \quad \begin{aligned} \Sigma_c &= \Sigma(S, S') - \Sigma(S, 0)[\Sigma(0, 0')]^{-1}\Sigma(S, 0)^T \\ &= \tau^2 \exp \left[ -\phi \left| \frac{S - S'}{\max(S)} \right|^2 \right] - \tau^2 \exp \left\{ -\phi \left[ \frac{S^2 + S'^2}{\max(S)^2} \right] \right\}. \end{aligned}$$

#### LITERATURE CITED

Hogg, R.V., J. W. McKean, and A. Craig. 2004. Introduction to mathematical statistics. Prentice Hall (Sixth edition), Upper Saddle River, New Jersey, USA.
